# Supplementary material
Source: PubMed Central journal article supplement (PMC2579378)
Supplement: 0809151105_0809151105SI.pdf [file 0809151105_0809151105SI.pdf]

# Supporting Information

Chang *et al.* 10.1073/pnas.08091511105

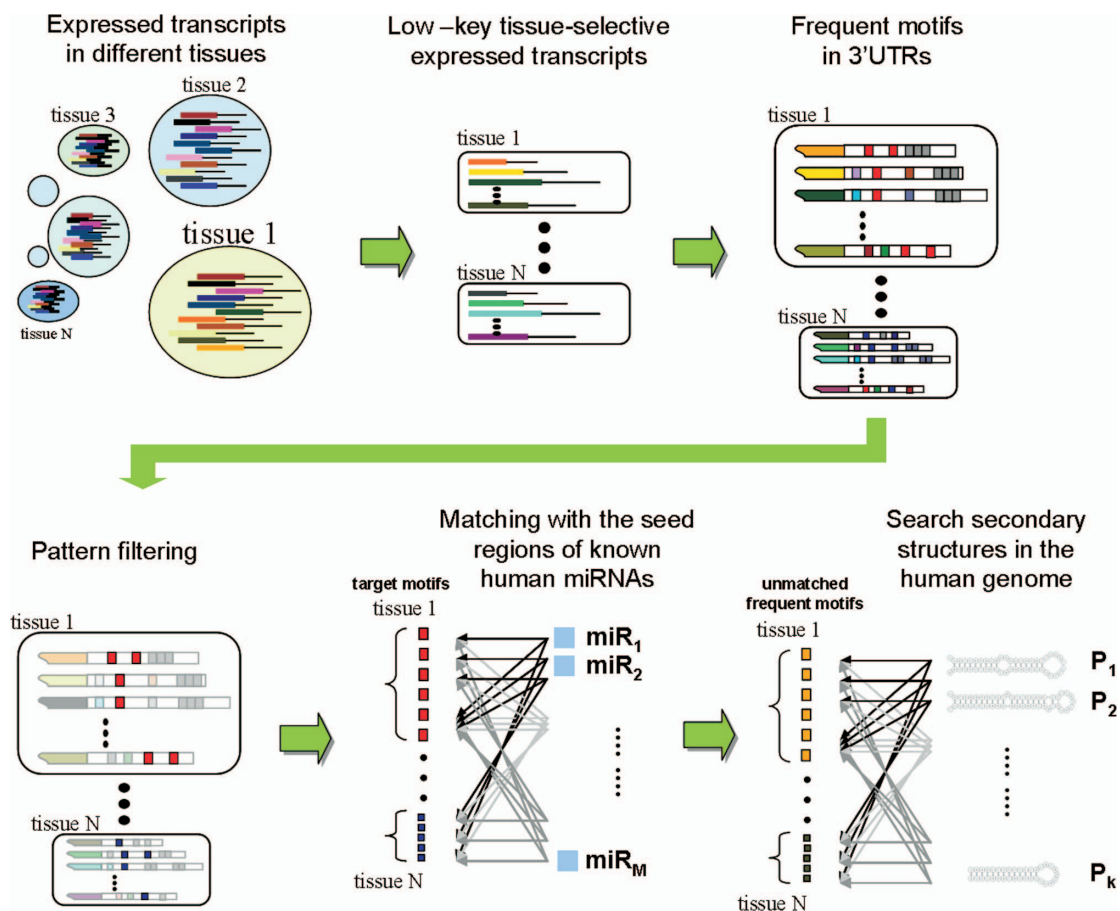

Fig. S1. Flowchart of the proposed method.

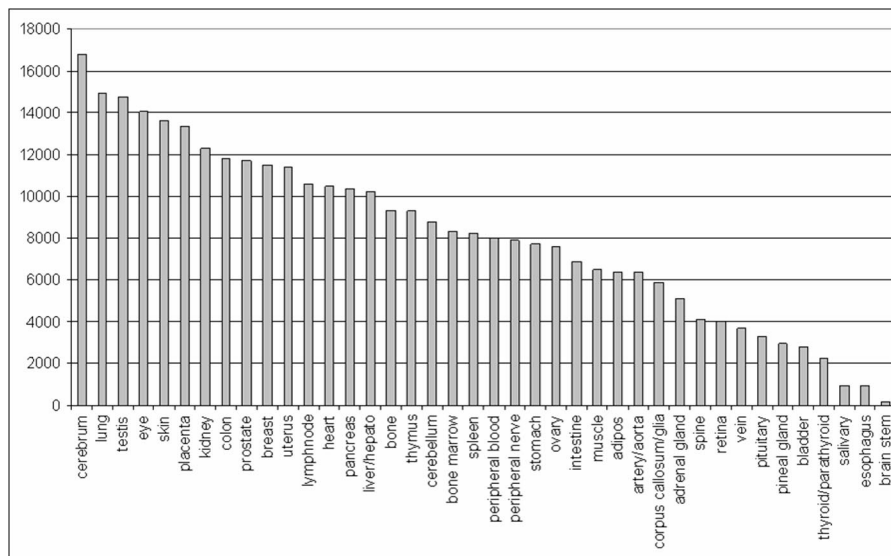

Fig. S2. Distribution of 18,021 human Ensemble genes in 40 tissues from BodyMap-Xs database.





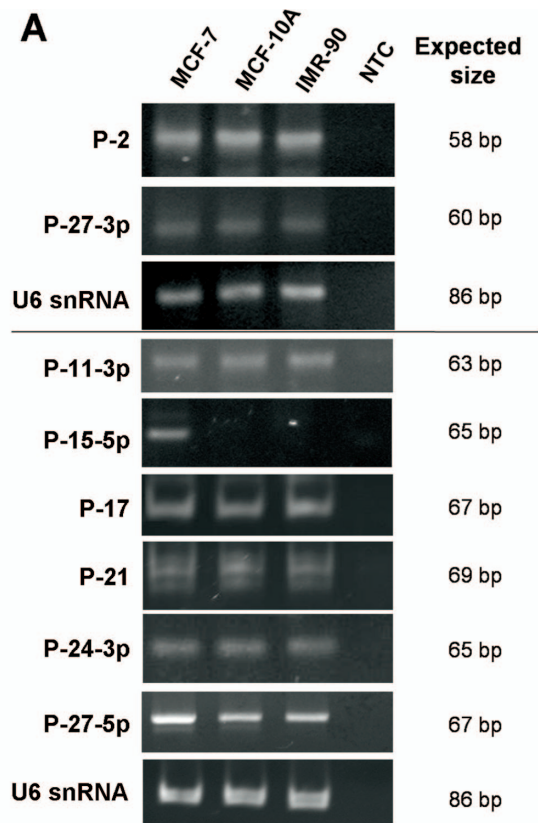

**B**

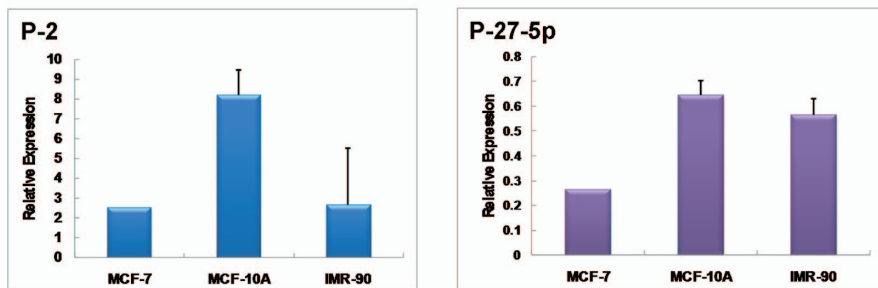

**Fig. S5.** PCR amplification of eight novel mature miRNAs and their endogenous expression levels. (A) Gel electrophoresis bands of eight novel mature miRNAs amplified by PCR. U6 snRNA was used as an internal standard. (B) Relative gene expression levels for P-2 and P-27-5p by real-time PCR analysis with respect to U6 small nuclear RNA expression levels. P-17, P-21, and P-24-3p have been registered as hsa-miR-2052, hsa-miR-2054, and hsa-miR-2053-3p, respectively.



**Table S1. Predicted novel miRNAs with no G/U pairing in the seed match**

| Frequent motif                                                                                                                                                                                  | Tissues of motif identified                                                                                                                                                                                                                                                           | Predicted novel miRNA                                                                                                                                | Predicted miRNA mature sequence                                                                                                                                                                                                                                                                                                                                                                                  | Genomic coordinates (NCBI 36.1)                                                                                                                                                                                                                                                                                                                                                                                                                                                                           | Gene located                                                           |
|-------------------------------------------------------------------------------------------------------------------------------------------------------------------------------------------------|---------------------------------------------------------------------------------------------------------------------------------------------------------------------------------------------------------------------------------------------------------------------------------------|------------------------------------------------------------------------------------------------------------------------------------------------------|------------------------------------------------------------------------------------------------------------------------------------------------------------------------------------------------------------------------------------------------------------------------------------------------------------------------------------------------------------------------------------------------------------------|-----------------------------------------------------------------------------------------------------------------------------------------------------------------------------------------------------------------------------------------------------------------------------------------------------------------------------------------------------------------------------------------------------------------------------------------------------------------------------------------------------------|------------------------------------------------------------------------|
| AUGCAA<br>GACAGAC                                                                                                                                                                               | Artery/aorta, uterus<br>Intestine, liver/hepato,<br>pituitary, breast                                                                                                                                                                                                                 | P-1<br>P-2                                                                                                                                           | AUUUGCAUAAUGGAUGC<br>AGUCUGUCCCAUACAUA                                                                                                                                                                                                                                                                                                                                                                           | Chr2:205539433–205539449<br>Chr6:44077683–44077700                                                                                                                                                                                                                                                                                                                                                                                                                                                        | ENSG00000116117<br>ENSG00000181577                                     |
| GGACAGA<br>AGCUGAA<br>UAAUUGG<br>UUCAAAAG<br>UUUCAA                                                                                                                                             | Breast<br>Peripheral nerve<br>Ovary<br>Liver/hepato<br>Cerebrum, intestine,<br>liver/hepato, pancreas                                                                                                                                                                                 | P-3<br>P-4<br>P-5                                                                                                                                    | GUCUGUCCCAUACAUAU<br>UUUCAGCUCAUAAAA<br>UCCAAUUAAAGUCUUUAAAA<br>CCUUUGAAAAUAUAAAAUC<br>CUUUGAAAAUAUAAAAUC                                                                                                                                                                                                                                                                                                        | Chr6:44077684–44077701<br>Chr5:82856771–82856785<br>Chr8:83086984–83087003<br>Chr8:35236713–35236732<br>Chr8:35236714–35236732                                                                                                                                                                                                                                                                                                                                                                            | ENSG00000038427<br>ENSG00000156687                                     |
| UCAUUU<br>AAAUUGA<br>UAAAUUG<br>AAUUGAG<br>GCAUUU<br>AUGUUC<br>CCAUUCA<br>UUGUGCA<br>ACAAUUC<br>GGUCUUG<br>AUCUACC<br>AUGCAUU<br>AUAAUGA<br>AAUGUCA<br>CUAAUUA<br>GCUAAUU<br>UGUAAAU<br>AUUAACA | Kidney<br>Lymph node<br>Placenta<br>Kidney<br>Peripheral nerve<br>Artery/aorta<br>Retina<br>Lymph node<br>Cerebrum<br>Lung<br>Testis<br>Lymph node<br>Cerebrum<br>Placenta<br>Retina<br>Thymus, testis, liver/hepato<br>Placenta<br>Cerebrum, lymph node,<br>placenta, lung, pancreas | P-6–3p<br>P-6–5p<br>P-7–3p<br>P-8<br>P-9–3p<br>P-9–5p<br>P-10<br>P-11–3p<br>P-11–5p<br>P-12–3p<br>P-13–5p-1<br>P-13–3p<br>P-14<br>P-15–3p<br>P-15–5p | UAAAUUGAGGUGGAUCCUGU<br>CUCAAUUUAUCCUAGAAACA<br>UCAUUUUUCCUAGAAACAG<br>UCUCAUUUAUCCUAG<br>AAAUUGCCAUAAAGUG<br>AUGAACAUUGAUUUUU<br>UUGAAUGGCCACUAGGGUU<br>CUGCACACCCUAGGAGAGGG<br>UGAUUUGUUCAGAUUGAUGA<br>UCAAGACCUACUUUACCUACC<br>GGUAGAUAGAACAGGUUCUUG<br>AAAUGCAUGAAAUGAU<br>UCAUUUAAAAUGUGAUAAUGU<br>GUGACAUUAGACAUUACA<br>UUAAUUAGCAAAAAGGCU<br>UAAUUAGCAAAAAGGCU<br>AAUUAAACAGAAUUAUU<br>UUGUAAUCAAAAAACUAU | Chr15:57977629–57977648<br>Chr15:57977582–57977602<br>Chr15:57977583–57977603<br>chr15:57977581–57977597<br>Chr9:80472606–80472621<br>Chr11:132066843–132066859<br>ChrX:109185270–109185290<br>ChrX:109185228–109185248<br>Chr7:27256727–27256746<br>Chr15:81221851–81221870<br>Chr15:81221817–81221836<br>Chr1:158032773–158032789<br>Chr15:51019585–51019606<br>Chr15:51019643–51019663<br>Chr1:208493640–208493657<br>Chr1:208493641–208493657<br>Chr5:146055768–146055784<br>Chr5:146055739–146055757 | ENSG00000183715<br>ENSG00000157600<br>(hsa-miR-652)<br>ENSG00000156475 |
| UGAAUUAU                                                                                                                                                                                        | Cerebrum, pineal gland,<br>peripheral blood                                                                                                                                                                                                                                           | P-16–5p                                                                                                                                              | UAUAUUCACAUUUUUGGAU                                                                                                                                                                                                                                                                                                                                                                                              | Chr7:146609661–146609680                                                                                                                                                                                                                                                                                                                                                                                                                                                                                  | ENSG00000174469                                                        |
| UCAAAAC<br>UAAUUUC<br>AAUUUCA                                                                                                                                                                   | Placenta, lung<br>Kidney<br>Lymph node, placenta,<br>testis, kidney, pancreas                                                                                                                                                                                                         | P-17<br>P-18–1                                                                                                                                       | UGUUUUGUAACAGUAAUGU<br>UGAAAUAUUAUACCAACA<br>UUGAAAUAUUAUACCAACA                                                                                                                                                                                                                                                                                                                                                 | Chr8:75780484–75780503<br>Chr10:128235007–128235025<br>Chr10:128235006–128235025                                                                                                                                                                                                                                                                                                                                                                                                                          |                                                                        |
| UUGUAGU<br>GGAGUUG<br>AUUAUCU<br>AUUACAG                                                                                                                                                        | Lymph node<br>Vein<br>Lymph node<br>Cerebrum, lymph node,<br>uterus, muscle, lung,<br>kidney, pancreas                                                                                                                                                                                | P-19–1<br>P-19–2<br>P-20–1<br>P-21                                                                                                                   | GACUACAUCUCCCAAGGUA<br>ACAACUCCCAAGGUACAUA<br>UAGAUAAUUUGCACAUAU<br>CUGUAAUAUAAAUAUUUAUU                                                                                                                                                                                                                                                                                                                         | Chr1:153246074–153246092<br>Chr1:153246078–153246098<br>Chr14:72223490–72223508<br>Chr4:126647864–126647886                                                                                                                                                                                                                                                                                                                                                                                               | ENSG00000160685<br>ENSG00000205683                                     |
| UUUUAAC<br>UUUAACA                                                                                                                                                                              | Cerebrum, lymph node<br>Placenta, prostate,<br>pancreas                                                                                                                                                                                                                               | P-22                                                                                                                                                 | UGUUAAAAAAGAAAAACAA<br>UUGUUAAAAAAGAAAAACAA                                                                                                                                                                                                                                                                                                                                                                      | Chr3:85884941–85884960<br>Chr3:85884940–85884960                                                                                                                                                                                                                                                                                                                                                                                                                                                          | ENSG00000175161                                                        |
| CAUAUA<br>AAUUAAC<br>AUUUACA<br>UAUUUAC<br>UUUACAU                                                                                                                                              | Cerebrum, prostate, lung<br>Placenta<br>Placenta<br>Cerebrum, placenta, kidney<br>Lymph node, placenta,<br>kidney, pancreas                                                                                                                                                           | P-23<br>P-24–3p<br>P-24–5p                                                                                                                           | GUAUAUUGGACAUACAUGU<br>GUGUUAUUAAAACCUCAUUUAC<br>AUGUAAUACAGAUUUAAUUAAC<br>UGUAAUACAGAUUUAAUUAACA<br>CAUGUAAUACAGAUUUAAUUA                                                                                                                                                                                                                                                                                       | Chr1:1463389–1463408<br>Chr8:113724958–113724980<br>Chr8:113724904–113724926<br>Chr8:113724905–113724927<br>Chr8:113724902–113724924                                                                                                                                                                                                                                                                                                                                                                      | ENSG00000164796                                                        |
| AAAUUAC<br>GAAAUUU                                                                                                                                                                              | Lymph node, placenta<br>Cerebrum, placenta,<br>prostate, testis, lung,<br>pancreas                                                                                                                                                                                                    | P-25                                                                                                                                                 | AGUAAUUUCGAUAAAGCCCUU<br>UAAUUUUCGAUAAAGCCCUU                                                                                                                                                                                                                                                                                                                                                                    | Chr10:129082297–129082318<br>Chr10:129082299–129082318                                                                                                                                                                                                                                                                                                                                                                                                                                                    | ENSG00000150760                                                        |
| UCAUGUU<br>AAUCUUU                                                                                                                                                                              | Placenta<br>Lymph node, placenta,<br>prostate, lung, pancreas                                                                                                                                                                                                                         | P-26<br>P-27–5p                                                                                                                                      | CCAACAUGAUGCUAUAAAAU<br>CAAAGAUUCAUCCUUGUGU                                                                                                                                                                                                                                                                                                                                                                      | Chr17:73293262–73293281<br>Chr21:36014906–36014929                                                                                                                                                                                                                                                                                                                                                                                                                                                        | ENSG00000159216<br>(hsa-miR-802)                                       |
| UCCUUGU<br>CUAAUAA                                                                                                                                                                              | Ovary, breast<br>Lymph node, placenta                                                                                                                                                                                                                                                 | P27–3p<br>P-28                                                                                                                                       | AACAAGGAGAAUCUUUGUCACU<br>UUUAAUAGUGCAUAUAAUA                                                                                                                                                                                                                                                                                                                                                                    | Chr21:36014934–36014955<br>Chr2:219696897–219696916                                                                                                                                                                                                                                                                                                                                                                                                                                                       | ENSG00000187736                                                        |





**Table S2. Predicted novel miRNAs with 1 G/U pairing in the seed match**

| Frequent motif | Tissues of motif identification                              | Predicted novel miRNA | Predicted miRNA mature sequence | Genomic coordinates (NCBI 36.1) | Gene located    |
|----------------|--------------------------------------------------------------|-----------------------|---------------------------------|---------------------------------|-----------------|
| UCCAUCU        | Retina                                                       | P-6-3p                | GAGGUGGAUCCUGUCCAUAU            | Chr15:57977635-57977655         |                 |
| AAUUUGU        | Lymph node                                                   | P-7-3p                | UGCAAUUUGCCAUAAGUG              | Chr9:80472603-80472621          |                 |
| UAAAGUG        | Prostate, testis                                             | P-7-5p                | CAUUUUUUGGCAUUUGUU              | Chr9:80472560-80472583          |                 |
| UGAAUA         | Placenta, testis, liver/hepato, kidney, pancreas             | P-12-5p               | CUAUUUUUGCAUUCUA                | Chr1:158032753-158032774        |                 |
| UUACAUU        | Lymph node, uterus, placenta, prostate, kidney, pancreas     | P-13-5p-2             | AAAUGUGAUAAUGUCAUUGC            | Chr15:51019593-51019612         |                 |
| UUAACAG        | Placenta, pancreas                                           | P-15-5p               | CUUGUUAUCAAACAAUUAU             | Chr5:146055738-146055757        | ENSG00000156475 |
| UGGAUUA        | Cerebrum                                                     | P-16-3p               | UAUAUUCUAUGAAUUAU               | Chr7:146609695-146609711        | ENSG00000174469 |
| GAUAUAU        | Lymph node, prostate, lung, pancreas                         |                       | AAUAUAUUCUAUGAAUUAU             | Chr7:146609693-146609711        |                 |
| UGAUUAU        | Kidney                                                       | P-18-2                | UUAUAUUACCAACAGAAAU             | Chr10:128235012-128235030       |                 |
| AGAUUAU        | Lymph node                                                   | P-20-2                | GAUAUUUUGCACAUAU                | Chr14:72223492-72223508         | ENSG00000205683 |
| AACAUUU        | Lymph node, ovary, kidney, pancreas                          | P-24-3p               | UAAGUGUUAUUAAACCCUCA            | Chr8:113724955-113724975        | ENSG00000164796 |
| UAACAUU        | Cerebrum, skin, placenta                                     |                       | AAGUGUUAUUAAACCCUCAU            | Chr8:113724956-113724977        |                 |
| UGAUUUC        | Bone, lung                                                   | P-32-2                | GGAAUUUUGCUGAACUCAUU            | Chr4:21498382-21498403          | ENSG00000185774 |
| UAAUGUU        | Artery/aorta                                                 | P-39                  | UGACAUUAGUUAUUU                 | Chr2:56002041-56002056          | ENSG00000115380 |
| UUUUAAG        | Lymph node, skin, placenta, lung, pancreas                   | P-40                  | GCUUAGAAAAGUGACCUAGA            | Chr2:77350845-77350864          | ENSG00000176204 |
| GCUGUUU        | Lung                                                         | P-41                  | AAAGCAGCGUGAAGAUGC              | Chr2:105075146-105075163        | ENSG00000135972 |
| UGCAUAU        | Peripheral nerve, placenta, pancreas                         | P-42                  | UAUAUGUAGAUUGAUAUAU             | Chr2:192552553-192552573        | ENSG00000144339 |
| AGAUUAU        | Lymph node                                                   | P-43                  | AUAUUUUAUAGAACAUAUAG            | Chr3:60801997-60802017          | ENSG00000189283 |
| AGUAAUU        | Lymph node                                                   | P-44                  | UAAUUUUUUUCUCAUC                | Chr3:62045270-62045287          | ENSG00000144724 |
| GUAUUUA        | Lymph node, kidney, pancreas                                 |                       | UUAUUUUUUUUUCUCAUC              | Chr3:62045269-62045287          |                 |
| UUCAUUU        | Lymph node                                                   | P-45                  | UAAUUGGAAUUUCAUUU               | Chr4:146917406-146917423        | ENSG00000151612 |
| GCACAUU        | Lung                                                         | P-46                  | UAAUGUGUAAUGCUGUAGUUU           | Chr4:153150954-153150974        |                 |
| GUCUAUA        | Lymph node, lung                                             | P-47                  | AUGUAGACAAAACAUCCAGAUAA         | Chr5:15476433-15476455          |                 |
| UGUCUAU        | Lung                                                         |                       | UGUAGACAAAACAUCCAGAU            | Chr5:15476434-15476453          |                 |
| GAAUAAU        | Cerebrum, eye, lymph node, ovary, lung, kidney               | P-48                  | AUUUUUUUAGUAAUUAACAG            | Chr5:36750623-36750643          |                 |
| AAUAACU        | Lymph node, placenta, lung, pancreas                         | P-49                  | AAGUUGUUUCUGCAUAAA              | Chr5:104185237-104185254        |                 |
| AGAGUUA        | Cerebrum, skin, placenta                                     | P-50                  | UAACUUUUUAAUGUAAGCCUGG          | Chr6:50426012-50426032          |                 |
| UAAGAGU        | Placenta, pancreas                                           |                       | AACUUUUUAAUGUAAGCC              | Chr6:50426013-50426029          |                 |
| GCAAAAU        | Cerebrum, retina, placenta, prostate                         | P-51                  | UGUUUUGCCAGCAUGUGGUUG           | Chr9:72221811-72221831          |                 |
| UAAGUGA        | Cerebrum                                                     | P-52                  | UUCAUUUAAAAUUAGGC               | Chr10:13522803-13522819         | ENSG00000165626 |
| UUAAGUG        | Lymph node, placenta, lung                                   |                       | UCAUUUAAAAUUAGGC                | Chr10:13522804-13522819         |                 |
| UUUAAGU        | Lymph node, placenta, kidney                                 |                       | UCAUUUAAAAUUAGGC                | Chr10:13522803-13522819         |                 |
| AAGUGAA        | Cerebrum                                                     |                       | AUUCAUUUAAAAUUAGGC              | Chr10:13522801-13522819         |                 |
| UUAAGAU        | Placenta, lung, pancreas                                     | P-53                  | CAUCUUGAAAUAAGUCCUCA            | Chr11:122110545-122110564       | ENSG00000154127 |
| UUUAAGA        | Lymph node, uterus, prostate, testis, lung, kidney, pancreas |                       | AUCUUGAAAUAAGUCCUCAU            | Chr11:122110546-122110565       |                 |
| UUUUAAG        | Lymph node, skin, placenta, lung, pancreas                   |                       | UCUUGAAAUAAGUCCUCAUC            | Chr11:122110547-122110566       |                 |
| UUGAUUA        | Lymph node, lung, pancreas                                   | P-54                  | AUAUCAGAAACACUAUAUCA            | Chr13:6638959-66389614          | ENSG00000184226 |
| UAAUUGU        | Lymph node, placenta                                         | P-55                  | UAUAUUUAAACAUACACUUG            | Chr13:104638844-104638862       |                 |
| AUUAGUU        | Lymph node, kidney                                           | P-56                  | GAAUUAAUGGUUUUA                 | Chr14:56071430-56071448         |                 |
| UAGUUUA        | Placenta                                                     | P-57                  | UAAUUUAAAAUCAUAUUUU             | Chr16:7601200-7601219           | ENSG00000078328 |
| GAAUUUC        | Skin, placenta                                               | P-58                  | GGGAUUCCACUCUCGAG               | Chr17:9233266-9233289           | ENSG00000170310 |
| GGAAUUU        | Kidney                                                       |                       | GGAAUUCACUCUCGCA                | Chr17:9233267-9233288           |                 |
| AUUCUGA        | Kidney                                                       | P-59                  | UUUAGAAUUCUAUUUA                | Chr18:26697252-26697267         |                 |
| GCAAAUU        | Lymph node                                                   | P-60                  | UGAUUUGCAUUUUAGU                | Chr18:40000232-40000247         |                 |
| AUGAAGU        | Uterus, lung                                                 | P-61                  | UAUUUCAUUUUAAUCUUGA             | Chr19:35550032-35550050         |                 |
| UAGCAAG        | Prostate                                                     | P-62                  | CUUGUUUAAAAAGCAGAUUCU           | Chr14:100584767-100584786       | hsa-miR-544     |
| UUUUAGC        | Lung                                                         |                       | UGUUAAAAAGCAGAUUCUGA            | Chr14:100584769-100584788       |                 |
| UUGUUGA        | Kidney                                                       | P-63-1                | CUCAAUAAGUAUUUGUUGA             | ChrX:113793391-113793409        | ENSG00000147246 |
| UCAUAUA        | Prostate, adrenal gland                                      | P-63-2                | UUUGUUGAAAGAAUAAUUA             | ChrX:113793402-113793421        | (hsa-miR-1264)  |
